# Supplementary material
Source: PubMed Central journal article supplement (PMC6839422)
Supplement: Supp_TableS1.pdf [file Supp_TableS1.pdf]

## Supplementary Data

SUPPLEMENTARY TABLE S1. CODING SCHEME

| <i>PrEP knowledge</i>                                                                  | <i>Risk behaviors</i>                                                  | <i>Barriers to PrEP</i>                                   | <i>Facilitators of PrEP</i>                 | <i>Comments about videos</i>     | <i>Identity</i>               |
|----------------------------------------------------------------------------------------|------------------------------------------------------------------------|-----------------------------------------------------------|---------------------------------------------|----------------------------------|-------------------------------|
| Sources of information for PrEP (e.g., clinic, friends, ads)                           | Engaging in condomless sex                                             | Stigma                                                    | Know someone with HIV                       | Informative                      | Bisexual                      |
| Side effects of PrEP                                                                   | Having sex with partners with unknown sexual history and/or HIV status | Distrust of health care system                            | Know someone on PrEP                        | Interesting                      | Gay                           |
| Cost and financing options for PrEP                                                    | Substance use                                                          | Concerns of being spotted at clinic or pharmacy (privacy) | Social support: peers, family, clinic staff | Discreet                         | Gender conformity             |
| Knowledge of frequency/duration of PrEP use                                            | Lack of HIV knowledge                                                  | Being assumed to be HIV+                                  | Lower risk                                  | Simple/straightforward messaging | College educated              |
| Knowledge of who is appropriate for PrEP and factors associated with high risk for HIV | Risk compensation (having increased sex because on PrEP)               | Transportation to and from clinic                         | Health statistics                           | Helpful subtitles                | No higher education           |
|                                                                                        | Provider unaware of PrEP                                               | Question drug efficacy                                    | Accessible                                  | Relatable                        | Age/age group                 |
|                                                                                        | Drug affordability                                                     | Worry after sexual encounter                              | Anxiety before sexual encounter             | Diverse                          | Gender expression             |
|                                                                                        | Frequency and duration of taking PrEP pill                             | PrEP strategies (e.g., reminders)                         | Realistic                                   | Visual appeal                    | Sexual orientation disclosure |
|                                                                                        | Forgetting to take PrEP pill                                           | STI/HIV testing concerns                                  | Provocative                                 | Timing of text messages          | Race                          |
|                                                                                        | Perceived reaction of sexual partner to PrEP                           |                                                           | Video length                                |                                  |                               |
|                                                                                        | Distrust of PrEP messaging                                             |                                                           |                                             |                                  |                               |
|                                                                                        | Peer reactions to PrEP                                                 |                                                           |                                             |                                  |                               |
|                                                                                        | Being assumed to be gay                                                |                                                           |                                             |                                  |                               |
|                                                                                        | Living in Jackson, Mississippi, and factors associated with location   |                                                           |                                             |                                  |                               |
|                                                                                        | Lack of social support                                                 |                                                           |                                             |                                  |                               |
|                                                                                        | Oversaturation with HIV prevention messaging                           |                                                           |                                             |                                  |                               |
|                                                                                        | Concern it will be difficult to get refills                            |                                                           |                                             |                                  |                               |

PrEP, pre-exposure prophylaxis; STI, sexually transmitted infections.
